# Supplementary material for: Upconverting the IR-A Range of the Sun Spectrum using Palladium Tetraaryltetraanthra[2,3]porphyrins
Source: Royal Society of Chemistry journal article supplement (doi:10.1039/c5pp00212e), 2015-01-01
Supplement: c5pp00212e1.pdf [file c5pp00212e1.pdf]

Supplementary Information

**Upconverting the IR-A Range of the Sun Spectrum using Palladium  
Tetraaryltetraanthra[2,3]porphyrins**

Vladimir Yakutkin, Mikhail A. Filatov, Iliyana Z. Ilieva, Katharina Landfester, Tzenka Miteva and Stanislav Balushev

*Photochem. Photobiol. Sci.*, 2015, DOI: 10.1039/C5PP00212E

This paper has been removed for legal reasons
